# Supplementary material
Source: PubMed Central journal article supplement (PMC7712636)
Supplement: NIHMS1647484-supplement-Supplemental_figures_tables.pdf [file NIHMS1647484-supplement-Supplemental_figures_tables.pdf]

## Supplementary Online Content

Efficacy of intralesional botulinum toxin A for treatment of painful cutaneous leiomyomas: a randomized clinical trial.

**eFigure.** Daily Pain Diary

**eTable 1.** Leiomyoma Characteristics and Percent Change in Pain Scores

**eTable 2.** Participants Grouped by Percent Change in Pain Scores

This supplementary material has been provided by the authors to give readers additional information about their work.

**eFigure.** Daily Pain Diary.

**Pain Diary Patient Self-Assessment**

\*\*Please complete this form at the same time each day. Please write name & dose of any pain meds taken each day.

Name: \_\_\_\_\_

Date: \_\_\_\_\_ Time: \_\_\_\_\_ am/pm

Answer the question **"My pain intensity at this time is?"** by marking the line.

|         |       |                     |
|---------|-------|---------------------|
| No Pain | _____ | Worst Possible Pain |
|---------|-------|---------------------|

Pain meds used OR new meds started: \_\_\_\_\_  
Initial here \_\_\_\_\_

Date: \_\_\_\_\_ Time: \_\_\_\_\_ am/pm

Answer the question **"My pain intensity at this time is?"** by marking the line.

|         |       |                     |
|---------|-------|---------------------|
| No Pain | _____ | Worst Possible Pain |
|---------|-------|---------------------|

Pain meds used OR new meds started: \_\_\_\_\_  
Initial here \_\_\_\_\_

Date: \_\_\_\_\_ Time: \_\_\_\_\_ am/pm

Answer the question **"My pain intensity at this time is?"** by marking the line.

|         |       |                     |
|---------|-------|---------------------|
| No Pain | _____ | Worst Possible Pain |
|---------|-------|---------------------|

Pain meds used OR new meds started: \_\_\_\_\_  
Initial here \_\_\_\_\_

Date: \_\_\_\_\_ Time: \_\_\_\_\_ am/pm

Answer the question **"My pain intensity at this time is?"** by marking the line.

|         |       |                     |
|---------|-------|---------------------|
| No Pain | _____ | Worst Possible Pain |
|---------|-------|---------------------|

Pain meds used OR new meds started: \_\_\_\_\_  
Initial here \_\_\_\_\_

**eTable 1.** Leiomyoma Characteristics and Percent Change in Pain Scores. *BTX*, botulinum toxin-A treatment arm; *PBO*, placebo treatment arm; *VAS*, visual analog scale

| Subject | Treatment Group | Total Injected Volume (ml) | Leiomyoma Characteristics                | Week 0 Pre-ice Pain VAS Score | Week 4 Pre-ice Pain VAS Score | % change in Pre-ice Pain VAS scores | Week 0 Post-ice Pain VAS Score | Week 4 Post-ice Pain VAS Score | % change in Post-ice Pain VAS Scores | Week 0 Average Lesional Pain | Week 4 Average Lesional Pain | % change in Average Pain Scores |
|---------|-----------------|----------------------------|------------------------------------------|-------------------------------|-------------------------------|-------------------------------------|--------------------------------|--------------------------------|--------------------------------------|------------------------------|------------------------------|---------------------------------|
| 1       | BTX             | 6                          | 6x11cm segmental                         | 6.3                           | 5.7                           | -9.5                                | 10                             | 9.5                            | -5.0                                 | 6                            | 7                            | 16.7                            |
| 2       | PBO             | 1.8                        | 6x8cm segmental                          | 0.2                           | 1.0                           | 400.0                               | 7.7                            | 4.6                            | -40.3                                | 6                            | not collected                | -                               |
| 3       | BTX             | 0.3                        | 4 discrete papules                       | 1.4                           | 1                             | -28.6                               | 7.4                            | 8.1                            | 9.5                                  | 4                            | 4                            | 0.0                             |
| 4       | PBO             | 0.55                       | 8 discrete papules on trunk/extremities  | 0.1                           | 0.7                           | 600.0                               | 1.1                            | 6.8                            | 518.2                                | 1                            | 1                            | 0.0                             |
| 5       | BTX             | 1.15                       | 15 discrete papules on trunk/extremities | 0.3                           | 0.2                           | -33.3                               | 5.1                            | 3.5                            | -31.4                                | 6                            | 1                            | -83.3                           |
| 6       | PBO             | 3.1                        | 10x11cm segmental                        | 0.5                           | 2.2                           | 340.0                               | 9.2                            | 7.6                            | -17.4                                | 4                            | 5                            | 25.0                            |
| 7       | BTX             | 1.5                        | 4.5x7cm segmental                        | 0                             | 0                             | -                                   | 5.2                            | 1.6                            | -69.2                                | 0                            | 0                            | -                               |
| 8       | PBO             | 0.1                        | 3 discrete papules                       | 1.6                           | 0.3                           | -81.3                               | 6.8                            | 0.1                            | -98.5                                | 1                            | 4                            | 300.0                           |
| 9       | PBO             | 0.14                       | 4x6cm segmental, 3 discrete papules      | 2.1                           | 2.2                           | 4.8                                 | 7.5                            | 6.7                            | -10.7                                | 4                            | 4                            | 0.0                             |
| 10      | BTX             | 1                          | 4x9cm segmental                          | 0                             | 0.8                           | -                                   | 7.1                            | 3.7                            | -47.9                                | 3                            | 1                            | -66.7                           |
| 11      | PBO             | 2.6                        | 4x6cm segmental                          | 0                             | 0                             | -                                   | 1.5                            | 0.5                            | -66.7                                | 1                            | 1                            | 0.0                             |
| 12      | BTX             | 5.9                        | 6x10cm segmental                         | 0                             | 0                             | -                                   | 0.8                            | 1                              | 25.0                                 | 5                            | 7                            | 40.0                            |
| 13      | BTX             | 2.4                        | 9.5x18cm segmental                       | 3.3                           | 0.1                           | -97.0                               | 3.2                            | 0.4                            | -87.5                                | 5                            | 0                            | -100.0                          |
| 14      | PBO             | 1.2                        | 3.5x5cm segmental                        | 0.1                           | 1.3                           | 1200.0                              | 5.9                            | 7.8                            | 32.2                                 | 5                            | 3                            | -40.0                           |
| 15      | BTX             | 1.65                       | 3.6x7.4cm segmental                      | 1.2                           | 1.6                           | 33.3                                | 9.4                            | 8.7                            | -7.4                                 | 4                            | 4                            | 0.0                             |
| 16      | PBO             | 0.5                        | 20x22cm segmental                        | 0.1                           | 0.1                           | 0.0                                 | 2.7                            | 2.1                            | -22.2                                | 6                            | 1                            | -83.3                           |
| 17      | BTX             | 1.8                        | 6.8x7.5cm segmental                      | 3.1                           | 0                             | -100.0                              | 6.7                            | 0.3                            | -95.5                                | 8                            | 2                            | -75.0                           |
| 18      | PBO             | 0.1                        | 0.6x0.8cm solitary papule                | 0                             | 0.4                           | -                                   | 4.3                            | 0.3                            | -93.0                                | 6                            | 1                            | -83.3                           |

**eTable 2.** Participants Grouped by Percent Change in Pain Scores. A. Percent change in average pain scores. B. Percent change in pre-ice VAS pain scores. C. Percent change in post-ice pain VAS scores. *BTX*, botulinum toxin-A treatment arm; *PBO*, placebo treatment arm; *VAS*, visual analog scale.

**A**

| <b>% Change in Average Pain Score</b> | <b>BTX</b> | <b>PBO</b> |
|---------------------------------------|------------|------------|
| >50% pain reduction                   | 4 (44%)    | 2 (22%)    |
| ≤50% pain reduction                   | 0 (0%)     | 1 (11%)    |
| No change in pain                     | 2 (22%)    | 3 (33%)    |
| Increased pain                        | 2 (22%)    | 2 (22%)    |
| Missing                               | 1 (11%)    | 1 (11%)    |
| Total                                 | 9          | 9          |

**B**

| <b>% Change in Pre-Ice VAS Score</b> | <b>BTX</b> | <b>PBO</b> |
|--------------------------------------|------------|------------|
| >50% pain reduction                  | 2 (22%)    | 1 (11%)    |
| ≤50% pain reduction                  | 3 (33%)    | 0 (0%)     |
| No change in pain                    | 0 (0%)     | 1 (11%)    |
| Increased pain                       | 1 (11%)    | 5 (55%)    |
| Missing                              | 3 (33%)    | 2 (22%)    |
| Total                                | 9          | 9          |

**C**

| <b>% Change in Post-Ice VAS Score</b> | <b>BTX</b> | <b>PBO</b> |
|---------------------------------------|------------|------------|
| >50% pain reduction                   | 3 (33%)    | 3 (33%)    |
| ≤50% pain reduction                   | 4 (44%)    | 4 (44%)    |
| No change in pain                     | 0 (0%)     | 0 (0%)     |
| Increased pain                        | 2 (22%)    | 2 (22%)    |
| Missing                               | 0 (0%)     | 0 (0%)     |
| Total                                 | 9          | 9          |
